# Supplementary material for: Melatonin Ameliorates the Progression of Atherosclerosis via Mitophagy Activation and NLRP3 Inflammasome Inhibition
Source: Hindawi journal article supplement (doi:10.1155/2018/9286458), 2018-01-01
Supplement: f1 [file 9286458.f1.pdf]

# Graphical Abstract

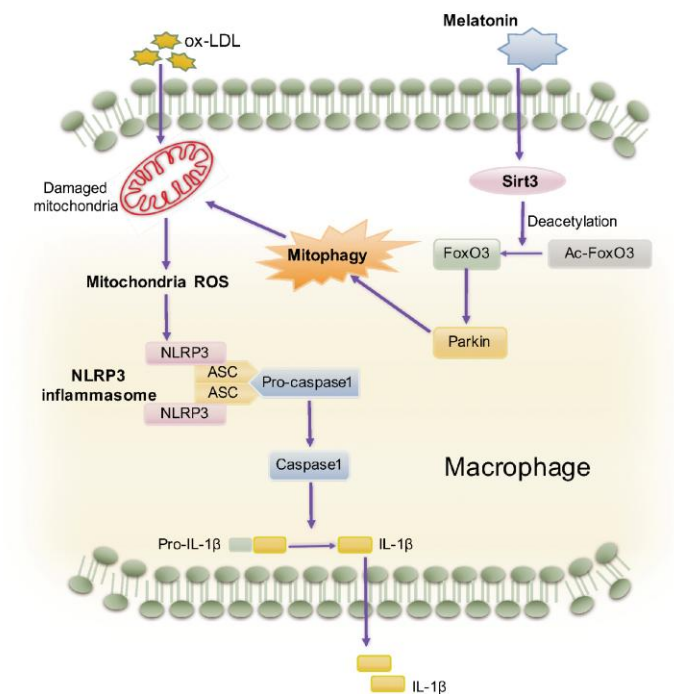

Ox-LDL induced mitochondrial damage, which contributed to the excessive mitoROS generation and consequential NLRP3 inflammasome activation in macrophages. Melatonin activated Sirt3 and FoxO3/Parkin-mediated mitophagy, attenuated the mitoROS level and the NLRP3 inflammasome activation, and subsequently reduced Caspase 1 activation and IL-1β secretion.
